# Supplementary material
Source: publisher figshare collection journal article supplement (https://sage.figshare.com/ndownloader/files/17360561)
Supplement: Supplementary file 1 [file 17360561]

Supplemental Appendix 1

*Downs & Black (1998) Quality Assessment Checklist*

| No | Brief description                                              | McCraty<br>et al | Ruck et<br>al | Bravo-<br>Mehmedbasic<br>et al | Booth | Engelmann | Dignam<br>& Fagan | Sidney<br>& Jette | Backer | Johns |
|----|----------------------------------------------------------------|------------------|---------------|--------------------------------|-------|-----------|-------------------|-------------------|--------|-------|
| 1  | Hypothesis/aims/objectives described?                          | 1                | 1             | 1                              | 1     | 1         | 0                 | 1                 | 1      | 1     |
| 2  | Main outcomes to be measured<br>described?                     | 1                | 1             | 1                              | 1     | 1         | 0                 | 1                 | 1      | 1     |
| 3  | Characteristics of patients described?                         | 1                | 0             | 0                              | 1     | 1         | 0                 | 1                 | 1      | 0     |
| 4  | Interventions described?                                       | 1                | 1             | 0                              | 1     | 1         | 1                 | 1                 | 1      | 1     |
| 5  | Distribution of confounders described?                         | 1                | 0             | 0                              | 1     | 0         | 1                 | 1                 | 0      | 0     |
| 6  | Main findings described?                                       | 1                | 1             | 0                              | 1     | 1         | 1                 | 1                 | 0      | 1     |
| 7  | Estimates of random variability in data?                       | 1                | 1             | 0                              | 1     | 1         | 0                 | 1                 | 1      | 1     |
| 8  | Important adverse events reported?                             | 0                | 0             | 0                              | 0     | 0         | 0                 | 0                 | 0      | 0     |
| 9  | Described patients lost to follow up?                          | 1                | 0             | 1                              | 1     | 1         | 0                 | 1                 | 1      | 1     |
| 10 | Actual probability values reported<br>unless < 0.001?          | 0                | 0             | 0                              | 1     | 1         | 0                 | 0                 | 1      | 1     |
| 11 | Subjects asked to participate<br>representative of population? | 1                | 1             | 0                              | 0     | 1         | 1                 | 1                 | 1      | 0     |

[illegible]

| No                 | Brief description                                                                                         | McCraty<br>et al | Ruck et<br>al | Bravo-<br>Mehmedbasic<br>et al | Booth | Engelmann | Dignam<br>& Fagan | Sidney<br>& Jette | Backer | Johns |
|--------------------|-----------------------------------------------------------------------------------------------------------|------------------|---------------|--------------------------------|-------|-----------|-------------------|-------------------|--------|-------|
| 21                 | Patients in intervention groups or cases and controls recruited from same population?                     | 1                | 1             | 1                              | 1     | 1         | 1                 | 1                 | 1      | 1     |
| 22                 | Subjects in different intervention groups or cases and controls recruited over same period?               | 1                | 0             | 0                              | 1     | 0         | 1                 | 1                 | 1      | 0     |
| 23                 | Subjects randomized to groups?                                                                            | 1                | 0             | 0                              | 0     | 1         | 0                 | 0                 | 1      | 1     |
| 24                 | Randomized assignments concealed until recruitment was complete?                                          | 0                | 0             | 0                              | 0     | 0         | 0                 | 0                 | 0      | 0     |
| 25                 | Adjustment for confounding in analysis?                                                                   | 1                | 0             | 0                              | 0     | 0         | 0                 | 0                 | 0      | 0     |
| 26                 | Losses to follow-up accounted for?                                                                        | 1                | 1             | 1                              | 1     | 1         | 0                 | 1                 | 1      | 1     |
| 27                 | Sufficient power to detect clinically important effect where P value for difference due to chance is < 5% | 0                | 1             | 1                              | 1     | 1         | 0                 | 1                 | 1      | 0     |
| Total Score ( /27) |                                                                                                           | 18               | 15            | 10                             | 19    | 18        | 12                | 18                | 19     | 14    |

Downs, S., & Black, N. (1998). The feasibility of creating a checklist for the assessment of the methodological quality both of randomised and non-randomised studies of health care interventions. *Journal of Epidemiology & Community Health*, 52, 377-384.
